# Supplementary material for: The Reduction of the Combined Effects of Aflatoxin and Ochratoxin A in Piglet Livers and Kidneys by Dietary Antioxidants
Source: Toxins (Basel). 2021 Sep 13;13(9):648. doi: 10.3390/toxins13090648 (PMC8472784; doi:10.3390/toxins13090648)
Supplement: Supplementary file 1 [file toxins-13-00648-s001.zip › toxins-1366525-SI.pdf]

# The Reduction of the Combined Effects of Aflatoxin and Ochratoxin A in Piglet Livers and Kidneys by Dietary Antioxidants

Roua Gabriela Popescu, Sorin Avramescu, Daniela Eliza Marin, Ionelia Țăranu, Sergiu Emil Georgescu and Anca Dinischiotu

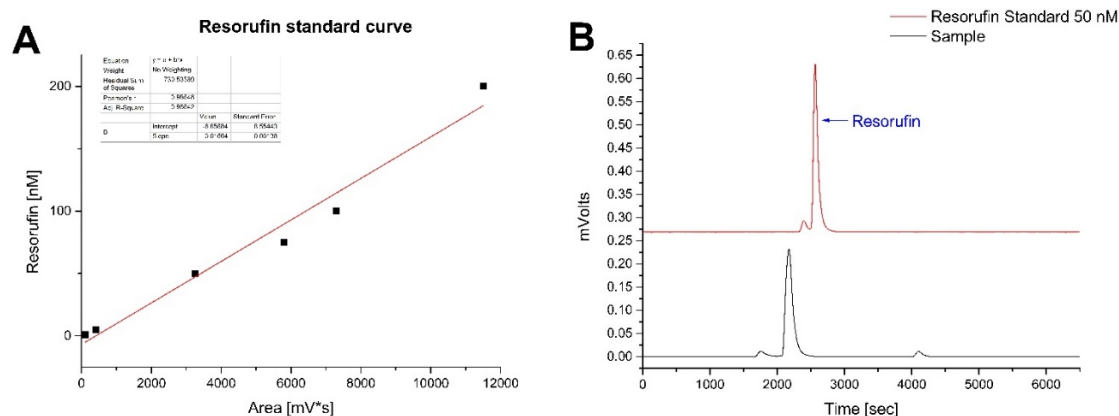

**Figure S1.** Quantification and separation of resorufin using reversed-phase HPLC (C18). Linear regression with a coefficient of determination of 0.97 was obtained for quantitative determination by integration of the peak area of six resorufin samples with known concentration levels: 1, 5, 50, 75, 100 and 200 nM (A). The fluorescence spectra with excitation and emission wavelengths of 560 and 586 nm were recorded using a Varian HPLC system. Mobile phase was 20 mM  $K_2HPO_4/KH_2PO_4$  buffer (pH 6.8), methanol and acetonitrile (30:35:35 v/v) with a flow rate of 0.5 mL/min at 40 °C, the stationary phase was C18, column dimensions: 150 × 4.6 mm; 3  $\mu$ m particle size. Sample volume was 20  $\mu$ L of 50 nM resorufin standard, respective sample of enzymatic reactions. Resorufin elutes at 3.66 minutes and is clearly separated from other similar /impurity molecules (B). Obtained data were analyzed using OriginPro 9 software.

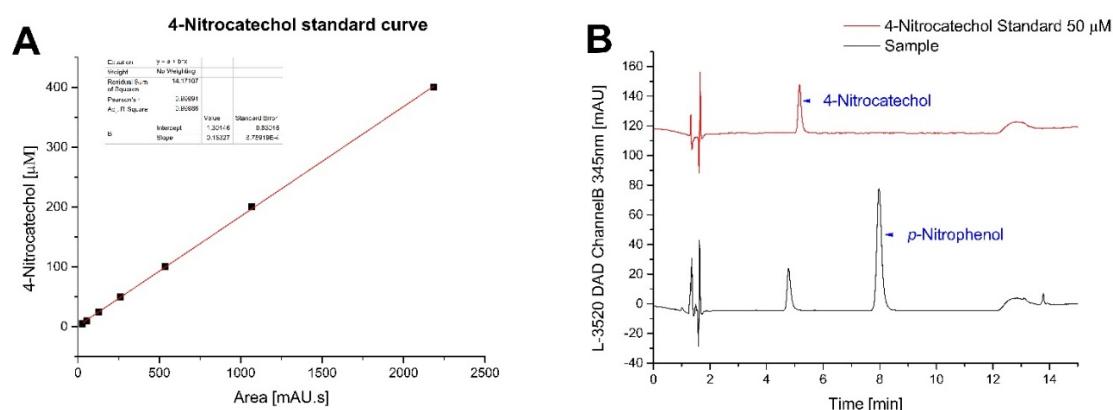

**Figure S2.** Quantification and separation of 4-nitro catechol using reversed-phase HPLC (C18). Linear regression with a coefficient of determination of 0.99 was obtained for quantitative determination by integration of the peak area of seven p-nitro catechol samples with known concentration levels: 5, 10, 25, 50, 100, 200 and 400  $\mu$ M (A). The light absorption spectra at 345 nm were recorded using a High-

Performance Liquid Chromatography Systems L-3000 (RIGOL Technologies, Inc.). Mobile phase was 0.1% trifluoroacetic acid in water as solvent A and 0.1% trifluoroacetic acid in acetonitrile as solvent B. The gradient profile was as follows: 0-10 min 85% solvent A; 10-12 min 85% solvent B; 12-15 min 100% solvent A, with a flow rate of 1 mL /min at 30 °C, the stationary phase was C18, column dimensions: 150 ×4.6 mm; 5 µm particle size. Sample volume was 20 µL of 50 µM p-nitrocatechol standard, respective sample of enzymatic reactions. P-Nitrocatechol elutes at 5.16 minutes and is clearly separated from other similar /impurity molecules (B). Obtained data were analyzed using OriginPro 9 software.

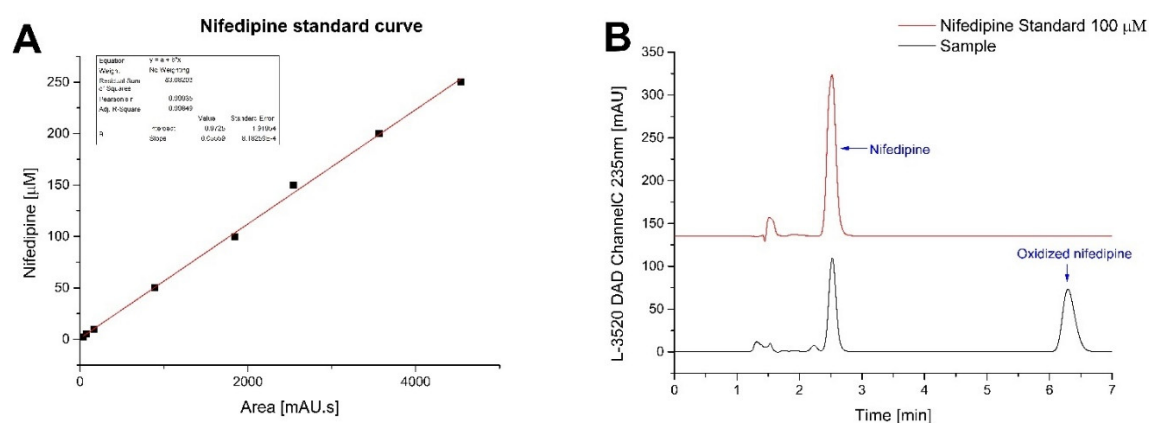

**Figure S3.** Quantification and separation of nifedipine using reversed-phase HPLC (C18). Linear regression with a coefficient of determination of 0.99 was obtained for quantitative determination by integration of the peak area of six nifedipine samples with known concentration levels: 2.5, 5, 10, 50, 200 and 250 µM (A). The light absorption spectra at 235 nm were recorded using a High-Performance Liquid Chromatography Systems L-3000 (RIGOL Technologies, Inc.). Mobile phase was 0.1% trifluoroacetic acid in water /acetonitrile /methanol (40:30:30) with a flow rate of 1 mL /min at 30 °C, the stationary phase was C18, column dimensions: 150 ×4.6 mm; 5 µm particle size. Sample volume was 20 µL of 100 µM nifedipine standard, respective sample of enzymatic reactions. Nifedipine elutes at 2.56 minutes and is clearly separated from other similar /impurity molecules (B). Obtained data were analyzed using OriginPro 9 software.
